# Supplementary material
Source: PubMed Central journal article supplement (PMC3358576)
Supplement: NIHMS351562-supplement-1.pdf [file NIHMS351562-supplement-1.pdf]

## Supplemental Digital Content 1

### Supplemental Materials and Methods

#### Dose Determination and Preparation of Drugs

For pharmacological interventions, the following two inhibitors were used: 1) a potent and specific SphK inhibitor DMS (Enzo Life Sciences Inc., Plymouth Meeting, PA) dissolved in dimethyl sulfoxide (DMSO; final concentration,  $0.17\mu\text{g}/0.5\mu\text{L}$ ); and 2) a S1P1- and S1P3- receptor antagonist VPC23019 (Avanti Polar Lipids Inc., Alabaster, Alabama) dissolved in DMSO/1N hydrogen chloride (95:5; final concentration,  $0.26\mu\text{g}/0.5\mu\text{L}$ ). These drugs were further diluted in phosphate-buffered saline (PBS) to a total volume of  $0.5\mu\text{L}$ , and administered intracerebroventricularly 1 hour before surgery. The vehicle groups were given the same volume ( $0.5\mu\text{L}$ ) of DMSO ( $1.1\text{g}/\text{mL}/\text{kg}$ ) diluted in PBS.

The dose for intracerebroventricular injections was calculated by determining the conversion coefficient by taking the ratio between blood volume ( $84.7\pm 1.2\text{mL}/\text{kg}$ ;  $2.3\text{mL}$  per mouse) (1) and cerebrospinal fluid (CSF) volume ( $0.04\text{mL}$  per mouse) (2). The dose for systemic administration (DMS,  $0.33\text{mg}/\text{kg}=0.01\text{mg}/\text{mouse}$ ; VPC23019,  $0.5\text{mg}/\text{kg}=0.015\text{mg}/\text{mouse}$ ) that was used in previous studies (3, 4) was divided by the conversion coefficient ( $0.01\text{mg}/57.5=0.17\mu\text{g}$  for DMS;  $0.015\text{mg}/57.5=0.26\mu\text{g}$  for VPC23019) to achieve an equivalent CSF concentration of the inhibitors.

## **Severity of SAH**

The severity of SAH was blindly evaluated using the SAH grading scale with high-resolution photographs at the time of sacrifice (5). The SAH grading system was as follows: the basal cistern was divided into six segments, and each segment was allotted a grade from 0 to 3 depending on the amount of subarachnoid blood clot in the segment; grade 0, no subarachnoid blood; grade 1, minimal subarachnoid blood; grade 2, moderate blood clot with recognizable arteries; and grade 3, blood clot obliterating all arteries within the segment. The animals received a total score ranging from 0 to 18 after adding the scores from all six segments.

## **Neurological Scores**

The neurological score was blindly evaluated at 24 and 72 hours after SAH, based on the scoring system of Garcia et al. (6) with modifications (Table 1). The evaluation consists of six tests that can be scored 0 to 3 or 1 to 3. These six tests include: spontaneous activity; symmetry in the movement of all four limbs; forelimbs outstretching; climbing; side stroking; and response to vibrissae (whisker stimulation). Animals were given a score of 3 to 18 in 1-number steps (higher scores indicate greater function).

**Table 1.** Modified Garcia's score

|                                                            | 0                | 1                         | 2                       | 3                              |
|------------------------------------------------------------|------------------|---------------------------|-------------------------|--------------------------------|
| Spontaneous activity (position changes in a cage for 5min) | No movement      | Barely move               | Touch 1-2 sides of cage | Touch 3-4 sides of cage        |
| Spontaneous movement of all four limbs                     | No movement      | Limited movement of limbs | Move fully but slowly   | Move the same as pre-SAH       |
| Forepaw outstretching                                      | No outstretching | Slight outstretching      | Limited outstretching   | Outstretch the same as pre-SAH |
| Climbing (1min)                                            | .....            | Failed climbing           | Weak climbing           | Normal climbing                |
| Body proprioception                                        | .....            | No response               | Weak response           | Normal response                |
| Response to vibrissae touch                                | .....            | No response               | Weak response           | Normal response                |

## References

1. Riches AC, Sharp JG, Thomas DB, et al: Blood volume determination in the mouse. *J Physiol* 1973; 228:279-284.
2. Artru AA: Spinal cerebrospinal fluid chemistry and physiology. *In*: Spinal drug delivery. First Edition. Yaksh TL (Eds). Netherlands, Elsevier, 1999, pp 216-217.

3. Hasegawa Y, Suzuki H, Sozen T, et al: Activation of sphingosine 1-phosphate receptor-1 by FTY720 is neuroprotective after ischemic stroke in rats. *Stroke* 2010; 41:368-374.
4. Wacker BK, Park TS, Gidday JM: Hypoxic preconditioning-induced cerebral ischemic tolerance: role of microvascular sphingosine kinase 2. *Stroke* 2009; 40:3342-3348.
5. Sugawara T, Ayer R, Jadhav V, et al: A new grading system evaluating bleeding scale in filament perforation subarachnoid hemorrhage rat model. *J Neurosci Methods* 2008; 167:327-334.
6. Garcia JH, Liu KF, Ho KL: Neuronal necrosis after middle cerebral artery occlusion in Wistar rats progresses at different time intervals in the caudoputamen and the cortex. *Stroke* 1995; 26:636-642.
